# Supplementary material
Source: JCI journal article supplement (doi:10.1172/jci203645)
Supplement: sd1 [file 1]

## Acknowledgements

### Hope in Action Investigator Teams

| Affiliation                                                                          | Name                                                                                                                                                                                                                                                                                                                                                                                                                                                                             |
|--------------------------------------------------------------------------------------|----------------------------------------------------------------------------------------------------------------------------------------------------------------------------------------------------------------------------------------------------------------------------------------------------------------------------------------------------------------------------------------------------------------------------------------------------------------------------------|
| Columbia University Medical Center                                                   | Brittney Destin; Marcus Pereira; Theresa Lukose; Dominique Piquant;                                                                                                                                                                                                                                                                                                                                                                                                              |
| David Geffen School of Medicine UCLA                                                 | Suphamai Bunnapradist; H. Albin Gritsch; Rosemary Silva; Adreanne Rivera; Jeffrey Veale                                                                                                                                                                                                                                                                                                                                                                                          |
| Drexel University                                                                    | Dong Heun Lee; Karthik Ranganna                                                                                                                                                                                                                                                                                                                                                                                                                                                  |
| Emory University Transplant Center                                                   | Rivka Elbein; Elizabeth Ferry; Jeryl Huckaby; William Kitchens; G. Marshall Lyon; Aneesh K. Mehta; Thomas Pearson; April Roberson                                                                                                                                                                                                                                                                                                                                                |
| Indiana University                                                                   | Oluwafisayo Adebisi; Margaret Adebisi                                                                                                                                                                                                                                                                                                                                                                                                                                            |
| Johns Hopkins University                                                             | Olivia M. Akinde; Serena Bagnasco; Brittany Barnaba; Gilad Bismut; Mary Grace Bowring; Diane Brown; Maggie Chahoud; Willa Cochran; Berlie DeJen; Niraj Desai; Christine Durand; Yolanda Eby; Reinaldo Fernandez; Naqvi Fizza; Feben Habtehyimer; Sarah Hussain; Morgan Keruly; Charles Kirby; Tao Liang; Jernelle Miller; Darin Ostrander; Michelle Prizzi; Grace Rozek; Jessica Ruff; Isabella Sengsouk; Haley Schmidt; Aaron Tobian; James Wiles; William Werbel; Xianming Zhu |
| Massachusetts General Hospital                                                       | Nahel Elias; Olivia Hess; Margaret Thomas; Kerry Crisalli                                                                                                                                                                                                                                                                                                                                                                                                                        |
| MedStar Georgetown Transplant Institute                                              | Alexander Gilbert                                                                                                                                                                                                                                                                                                                                                                                                                                                                |
| Methodist Health System Clinical Research Institute                                  | Karen Castro                                                                                                                                                                                                                                                                                                                                                                                                                                                                     |
| Mount Sinai Hospital, Recanati-Miller Transplantation Institute                      | Sander S. Florman; Brandy Haydel; Shirish Huprikar; Meenakshi M. Rana                                                                                                                                                                                                                                                                                                                                                                                                            |
| National Institute of Allergy and Infectious Diseases, National Institutes of Health | Erica Brittain; Megan Morsheimer; Jonah Odum; Thomas Quinn; Andrew Redd; Natasha Watson                                                                                                                                                                                                                                                                                                                                                                                          |
| New York University Langone Transplant Institute                                     | Rebecca Dieter; Allan Massie; Sapna Mehta; Jennifer D. Motter; Henry Neumann; Dorry Segev                                                                                                                                                                                                                                                                                                                                                                                        |
| Northwestern University                                                              | Michelle Callegari; Leah Goudy; Valentina Stosor                                                                                                                                                                                                                                                                                                                                                                                                                                 |
| Ochsner Health                                                                       | Jonathan Hand; Angela Smith; Ari Cohen                                                                                                                                                                                                                                                                                                                                                                                                                                           |
| Perelman School of Medicine at the University of Pennsylvania                        | Emily Blumberg; Maryann Najdzinowicz                                                                                                                                                                                                                                                                                                                                                                                                                                             |
| Positive Rhetoric LLC, Bowling Green, KY                                             | Brianna Doby                                                                                                                                                                                                                                                                                                                                                                                                                                                                     |
| Rush University Medical Center                                                       | Mark Mall; Carlos A. Santos                                                                                                                                                                                                                                                                                                                                                                                                                                                      |
| University of Alabama at Birmingham                                                  | Katherine Basinger; Jayme Locke; Shikha Mehta; Darnell Mompoin-Williams                                                                                                                                                                                                                                                                                                                                                                                                          |

|                                                     |                                                                                                            |
|-----------------------------------------------------|------------------------------------------------------------------------------------------------------------|
| University of Arkansas for Medical Sciences         | Sushma Bhusal; Emmanouil Giorgakis; Rebecca Wilson                                                         |
| University of California, San Diego                 | Saima Aslam; Kristin Mekeel; Layla Myers; Mita Shah                                                        |
| University of California, San Francisco             | Ada Chao; Monica Fung; Peter Chin Hong; Garrett Roll; Rodney Rogers; Peter Stock                           |
| University of California, Los Angeles               | Joanna Schaenman                                                                                           |
| University of Cincinnati                            | Senu Apewokin; Madison Cuffy; Samantha Kramer; Shimul Shah; Racheal Wilkinson                              |
| University of Maryland, Institute of Human Virology | Lisa Anderson; John Baddley                                                                                |
| University of Miami, Miami Transplant Institute     | Shweta Anjan; Adela Mattiazzi; Lissett Moni; Michele Morris; Carlos Munoz Jacques Simkins; Isabel Vital    |
| University of Pittsburgh Medical Center             | Ghady Haidar; Ken Ho; Kailey Hughes Kramer; Sarah McBeth; Diana L. Pakstis; Fernanda Silveira              |
| University of Texas Southwestern Medical Center     | Ricardo M. La Hoz; Jarrett Hubbard; Swee-Ling L. Levea; Jennifer Nixon; Parsia Vagefi; David Wojciechowski |
| Weill Cornell Medicine                              | Candace Alleyne; Anna Gwak; Thangamani Muthukumar; Catherine Small; Britta Witting                         |
| Yale School of Medicine                             | Richard Formica; Sanjay Kulkarni; Maricar Malinis; Ricarda Tomlin                                          |

### Transplant centers

| <b>HOPE in Action transplant center</b>                       | <b>Location</b>   |
|---------------------------------------------------------------|-------------------|
| Mount Sinai Medical Center (NYMS)                             | New York City, NY |
| Johns Hopkins Hospital (MDJH)                                 | Baltimore, MD     |
| Emory University Hospital (GAEM)                              | Atlanta, GA       |
| MedStar Georgetown Transplant Institute (DCGU)                | Washington DC     |
| University of California San Francisco Medical Center (CASF)  | San Francisco, CA |
| NYU Langone Health (NYUC)                                     | New York City, NY |
| University of Alabama Hospital (ALUA)                         | Birmingham, AL    |
| Northwestern Memorial Hospital (ILNM)                         | Chicago, IL       |
| NY Presbyterian/Columbia University Medical Center (NYCP)     | New York City, NY |
| University of Miami School of Medicine (FLJM)                 | Miami, FL         |
| Ochsner Foundation Hospital (LAOF)                            | New Orleans, LA   |
| University of California San Diego Medical Center (CASD)      | San Diego, CA     |
| University of Pittsburgh Medical Center (PAPT)                | Pittsburgh, PA    |
| Yale New Haven Hospital (CTYN)                                | New Haven, CT     |
| NY Presbyterian Hospital/Weill Cornell Medical Center (NYNY)  | New York City, NY |
| Rush University Medical Center (ILPL)                         | Chicago, IL       |
| University of California at Los Angeles Medical Center (CAUC) | Los Angeles, CA   |
| University of Maryland Medical Center (MDUM)                  | Baltimore, MD     |

|                                                   |                  |
|---------------------------------------------------|------------------|
| UT Southwestern Medical Center (TXSP)             | Dallas, TX       |
| Hahnemann University Hospital (PAHM)*             | Philadelphia, PA |
| Hospital of the University of Pennsylvania (PAUP) | Philadelphia, PA |
| Indiana University Health (INIM)                  | Indianapolis, IN |
| Massachusetts General Hospital (MAMG)             | Boston, MA       |
| Methodist Dallas Medical Center (TXMC)            | Dallas, TX       |
| University of Arkansas Medical Center (ARUA)      | Little Rock, AR  |
| University of Cincinnati Medical Center (OHUC)    | Cincinnati, OH   |

\* Two participants from PAHM were transferred to PAUP, since PAHM were closed during the study.

Supplemental Table 1. Characteristics of the kidney donors with PhIP testing vs without

|                                       | Donor included<br>n = 101 | Donor excluded<br>n =45 | p value          |
|---------------------------------------|---------------------------|-------------------------|------------------|
| Donor with HIV                        | 60 (59)                   | 4 (9)                   | <b>&lt;0.001</b> |
| Age, years, median (IQR)              | 36 (29, 47)               | 43 (32, 49)             | 0.12             |
| Female sex, n (%)                     | 33 (33)                   | 11 (24)                 | 0.34             |
| Race, n (%)                           |                           |                         | 0.81             |
| Black or African American             | 30 (30)                   | 13 (29)                 |                  |
| White                                 | 51 (50)                   | 25 (56)                 |                  |
| Other                                 | 20 (20)                   | 7 (15)                  |                  |
| Ethnicity                             |                           |                         | 1.00             |
| Hispanic or Latino                    | 17 (17)                   | 7 (16)                  |                  |
| Not Hispanic or Latino                | 84 (83)                   | 38 (84)                 |                  |
| Type of death, n (%)                  |                           |                         | 0.38             |
| Donation after cardiac death, n (%)   | 18 (18)                   | 11 (24)                 |                  |
| Donation after brain death, n (%)     | 83 (82)                   | 34 (76)                 |                  |
| Cause of death, n (%)                 |                           |                         | 0.057            |
| Anoxia                                | 50 (50)                   | 17 (38)                 |                  |
| Cerebrovascular/Stroke                | 25 (25)                   | 14 (31)                 |                  |
| Head Trauma                           | 26 (26)                   | 11 (24)                 |                  |
| Other                                 | 0 (0)                     | 3 (7)                   |                  |
| Steroid administered, n (%)           |                           |                         | 0.70             |
| No                                    | 36 (36)                   | 14 (31)                 |                  |
| Yes                                   | 62 (61)                   | 30 (67)                 |                  |
| Missing                               | 3 (3)                     | 1 (2)                   |                  |
| KDPI, median (IQR)                    | 40 (28, 58)               | 55 (35, 70)             | <b>0.024</b>     |
| Body mass index, median (IQR)         | 26 (23, 30)               | 28 (23, 33)             | 0.43             |
| History of hypertension, n (%)        |                           |                         | <b>0.023</b>     |
| No                                    | 79 (78)                   | 28 (62)                 |                  |
| Yes                                   | 19 (19)                   | 17 (38)                 |                  |
| Missing                               | 3 (3)                     | 0 (0)                   |                  |
| Diabetes, n (%)                       |                           |                         | 0.30             |
| No                                    | 94 (93)                   | 40 (89)                 |                  |
| Yes                                   | 5 (5)                     | 5 (11)                  |                  |
| Missing                               | 2 (2)                     | 0 (0)                   |                  |
| Serum creatinine, mg/dL, median (IQR) | 1.01 (0.75, 1.21)         | 1.00 (0.80, 1.41)       | 0.38             |
| Anti-HCV positive, n (%)              | 9 (9)                     | 4 (9)                   | 1.00             |
| HCV NAT positive, n (%)               | 7 (7)                     | 3 (7)                   | 1.00             |
| Anti HBcAb positive, n (%)            | 13 (13)                   | 2 (4)                   | 0.15             |
| HBsAg positive, n (%)                 | 1 (1)                     | 1 (2)                   | 1.00             |
| Anti CMV positive, n (%)              | 85 (84)                   | 30 (67)                 | <b>0.027</b>     |

Abbreviation: KDPI: Kidney Donor Profile Index; HCV: hepatitis C virus; NAT: Nucleic Acid Amplification Testing; HBcAb: hepatitis B core antibody; HBsAg: Hepatitis B surface antigen; CMV: cytomegalovirus.

P values were estimated using Wilcoxon rank sum tests for continuous variables and fisher's exact tests for categorical variables.

Missing values were excluded in the calculation of p values.

P<0.05 were in bold.

Supplemental Figure 1. Comparison of measured antibody reactivity using PhIP-Seq with measurement using gold standard testing.

Note: Abbreviation: CMV: cytomegalovirus.

Each dot represents a donor. VARScore above the horizontal dashed line (>1) represent positivity of antibody to CMV or HIV.

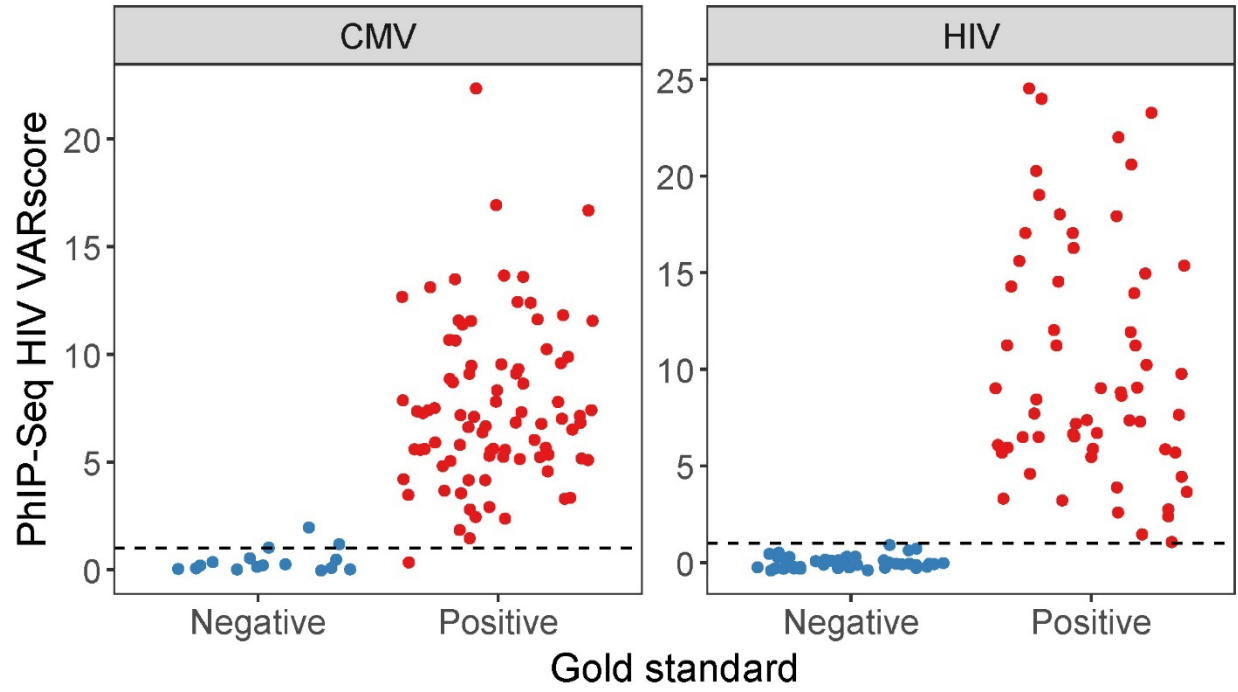

Supplemental Table 2. Reactivity of donor viral targets by donor HIV status (extension of Figure 2)

Note: Only viral species with raw p value<0.05 were included in this table. Log2 fold change represents the log2 ratio of a viral species between donors with HIV vs donors without HIV, and a positive log2 fold change suggests reactivity of the viral species was positively associated with donor HIV status.

| log2 fold change | p value    | q value    | Viral species                         |
|------------------|------------|------------|---------------------------------------|
| 3.70767582       | 0.0002007  | 0.02411442 | Epstein-Barr virus                    |
| -0.352635        | 0.00020621 | 0.02411442 | Human herpesvirus 7                   |
| 3.17180971       | 0.00021595 | 0.02411442 | Human cytomegalovirus                 |
| -3.0792569       | 0.00133573 | 0.11186744 | Rhinovirus A                          |
| -0.2261181       | 0.00173285 | 0.11610096 | Horsepox virus                        |
| 0.21482329       | 0.00231181 | 0.12907581 | Human papillomavirus type 12          |
| -0.3811709       | 0.00594159 | 0.24923098 | Human astrovirus-6                    |
| -0.7747952       | 0.00595178 | 0.24923098 | Human herpesvirus 6B                  |
| 0.30383052       | 0.00712755 | 0.26164088 | Canine kobuvirus US-PC0082            |
| -0.4412425       | 0.00781018 | 0.26164088 | Human papillomavirus type 37          |
| 0.25644795       | 0.00861007 | 0.26221579 | Crimean-Congo hemorrhagic fever virus |
| 0.17784953       | 0.01019752 | 0.27857057 | Dhori virus                           |
| 0.37228543       | 0.0108102  | 0.27857057 | Human adenovirus D serotype 17        |
| 0.1380726        | 0.01208327 | 0.27975611 | Hepatitis E virus                     |
| 0.25348765       | 0.01317035 | 0.27975611 | Rosavirus M-7                         |
| 0.44025043       | 0.01336149 | 0.27975611 | Human herpesvirus 8 type P            |
| 0.12359219       | 0.01612548 | 0.30011225 | Sin Nombre orthohantavirus            |
| -0.4777309       | 0.01700646 | 0.30011225 | Human astrovirus-1                    |
| -0.1263379       | 0.02003978 | 0.31306129 | Molluscum contagiosum virus           |
| 0.17395464       | 0.02010134 | 0.31306129 | Tai Forest ebolavirus                 |
| 0.20006486       | 0.02055925 | 0.31306129 | Human papillomavirus type 40          |
| -0.2605805       | 0.02354206 | 0.34289524 | Simian virus 12                       |
| 0.16021833       | 0.02744398 | 0.37163481 | Human papillomavirus type 13          |
| -0.5008972       | 0.02956515 | 0.37163481 | Human parainfluenza 3 virus           |
| -0.4573757       | 0.03330843 | 0.37163481 | Human astrovirus-8                    |
| -1.7875789       | 0.03352913 | 0.37163481 | Human respiratory syncytial virus     |
| -1.7054823       | 0.03490607 | 0.37163481 | Rhinovirus B                          |
| 0.11561456       | 0.03535585 | 0.37163481 | Human papillomavirus type 19          |
| -0.5194499       | 0.03543062 | 0.37163481 | Human parainfluenza 4a virus          |
| -0.9443496       | 0.03605986 | 0.37163481 | Human herpesvirus 3                   |
| 0.11813685       | 0.03747745 | 0.37163481 | Human coronavirus EMC                 |
| -0.1049473       | 0.03918074 | 0.37163481 | Camelpox virus                        |
| -1.3751532       | 0.03953773 | 0.37163481 | Hepatitis C virus genotype 1a         |
| 0.15286748       | 0.03955598 | 0.37163481 | Cercopithecine alphaherpesvirus 2     |
| -0.2008581       | 0.03993688 | 0.37163481 | KI polyomavirus                       |
| -0.9028937       | 0.04143311 | 0.37513762 | Human respiratory syncytial virus A   |
| -1.2423726       | 0.04327934 | 0.38154156 | Hepatitis C virus genotype 1c         |
| -0.3173811       | 0.04500343 | 0.38656795 | WU polyomavirus                       |
| 0.13798471       | 0.04632022 | 0.38793182 | Human papillomavirus type 61          |

Supplemental Table 3. Reactivity of donor human autoantibody targets by donor HIV status (extension of Figure 3)

Note: Only peptides of autoantibodies with raw p value < 0.05 were included in this table. Log2 fold change represents the log2 ratio of reactivity of a peptide between donors with HIV vs donors without HIV, and a positive log2 fold change suggests reactivity of the autoantibody peptide was positively associated with donor HIV status.

| log2 fold change | p value    | q value    | Autoantibody                                                          |
|------------------|------------|------------|-----------------------------------------------------------------------|
| -1.5139732       | 0.00071662 | 0.67495955 | capping protein, Arp2/3 and myosin-I linker protein 3                 |
| 3.40419355       | 0.00123169 | 0.67495955 | uncharacterized protein C12orf40 isoform 1                            |
| -7.3149528       | 0.00259967 | 0.67495955 | stathmin-4 isoform 1                                                  |
| 33.5795161       | 0.00284443 | 0.67495955 | hypothetical protein XP                                               |
| 2.9643391        | 0.00397105 | 0.67495955 | splicing factor, suppressor of white-apricot homolog isoform 2        |
| -2.2908694       | 0.00441811 | 0.67495955 | capping protein, Arp2/3 and myosin-I linker protein 3                 |
| -1.9147482       | 0.00456273 | 0.67495955 | protein piccolo isoform 1                                             |
| 29.0169355       | 0.0059823  | 0.67495955 | hypothetical protein XP                                               |
| 1.62935484       | 0.00754551 | 0.67495955 | C2 calcium-dependent domain-containing protein 4A                     |
| -1.2035012       | 0.00846838 | 0.67495955 | cingulin                                                              |
| 2.5583871        | 0.00937928 | 0.67495955 | coiled-coil domain-containing protein 134 isoform 1 precursor         |
| -3.6241778       | 0.00971378 | 0.67495955 | protein phosphatase 1 regulatory subunit 12B isoform a                |
| 2.57322581       | 0.00980266 | 0.67495955 | hypothetical protein XP                                               |
| -0.9037018       | 0.01116444 | 0.67495955 | bridging integrator 2 isoform 1                                       |
| 3.98564516       | 0.01143794 | 0.67495955 | keratin, type II cytoskeletal 6C                                      |
| 15.1585484       | 0.01208442 | 0.67495955 | hypothetical protein XP                                               |
| 17.5095161       | 0.01232064 | 0.67495955 | hypothetical protein XP                                               |
| 3.0677262        | 0.01339676 | 0.67495955 | synemin isoform A                                                     |
| -1.1424508       | 0.01472331 | 0.67495955 | rho GTPase-activating protein 35                                      |
| -1.0940716       | 0.0148897  | 0.67495955 | C2 domain-containing protein 3 isoform 2                              |
| 17.8129032       | 0.01542065 | 0.67495955 | hypothetical protein XP                                               |
| 1.30322581       | 0.01597753 | 0.67495955 | serine/threonine-protein phosphatase 1 regulatory subunit 10          |
| -0.7408222       | 0.01683501 | 0.67495955 | G-protein coupled receptor-associated sorting protein 1               |
| 1.89983871       | 0.01714428 | 0.67495955 | ephrin type-A receptor 6 isoform a                                    |
| -4.6149567       | 0.01835394 | 0.67495955 | SPARC-related modular calcium-binding protein 1 isoform 1 precursor   |
| -1.2628639       | 0.01851159 | 0.67495955 | G-protein coupled receptor-associated sorting protein 2               |
| -2.7914988       | 0.01861451 | 0.67495955 | SNF-related serine/threonine-protein kinase isoform 1                 |
| -1.2324587       | 0.01874733 | 0.67495955 | transcriptional activator GLI3                                        |
| -0.7696617       | 0.01882272 | 0.67495955 | cTAGE family member 2                                                 |
| -1.307443        | 0.01947424 | 0.67495955 | histone-lysine N-methyltransferase 2C                                 |
| 9.89935484       | 0.01973237 | 0.67495955 | hypothetical protein XP                                               |
| -1.2076711       | 0.01982151 | 0.67495955 | proliferation marker protein Ki-67 isoform 1                          |
| 17.5081196       | 0.02147627 | 0.67495955 | hypothetical protein XP                                               |
| 1.83974823       | 0.02161007 | 0.67495955 | bcl-2-binding component 3 isoform 1                                   |
| 11.2940323       | 0.02164618 | 0.67495955 | hypothetical protein XP                                               |
| 4.3245712        | 0.0218225  | 0.67495955 | ankyrin-2 isoform 1                                                   |
| -3.3261959       | 0.02345873 | 0.67495955 | SUN domain-containing protein 1 isoform a                             |
| 1.38177419       | 0.02376302 | 0.67495955 | protein phosphatase 1 regulatory subunit 12B isoform a                |
| -4.2619276       | 0.02404163 | 0.67495955 | SUN domain-containing protein 1 isoform a                             |
| 2.87478757       | 0.02488957 | 0.67495955 | ankyrin-2 isoform 1                                                   |
| 2.58606216       | 0.02540235 | 0.67495955 | voltage-dependent P/Q-type calcium channel subunit alpha-1A isoform 2 |
| 1.8583871        | 0.0257818  | 0.67495955 | keratin, type II cytoskeletal 6B                                      |
| 2.02709677       | 0.02632686 | 0.67495955 | keratin, type II cytoskeletal 6C                                      |
| -3.416247        | 0.02824296 | 0.67495955 | filaggrin-2                                                           |
| -0.8777616       | 0.02857903 | 0.67495955 | ras and Rab interactor 3 isoform 1                                    |
| -2.385295        | 0.02869312 | 0.67495955 | ras-related GTP-binding protein C isoform 1                           |
| 1.90053108       | 0.02924613 | 0.67495955 | hypothetical protein XP                                               |
| 1.61354839       | 0.03005415 | 0.67495955 | adiponectin receptor protein 1                                        |
| 2.30435484       | 0.03182302 | 0.67495955 | rho guanine nucleotide exchange factor 40 isoform 1                   |
| 0.63629032       | 0.03385021 | 0.67495955 | protein Wnt-9b isoform 1 precursor                                    |
| 1.27992132       | 0.03385138 | 0.67495955 | FH1/FH2 domain-containing protein 3 isoform 1                         |
| -2.1277026       | 0.0353138  | 0.67495955 | SAM and SH3 domain-containing protein 1 isoform 1                     |

|            |            |            |                                                                                  |
|------------|------------|------------|----------------------------------------------------------------------------------|
| -2.1590323 | 0.03544635 | 0.67495955 | hypothetical protein                                                             |
| 9.7216129  | 0.03550638 | 0.67495955 | hypothetical protein XP                                                          |
| -3.1534264 | 0.03581698 | 0.67495955 | SNF-related serine/threonine-protein kinase isoform 1                            |
| 1.8029465  | 0.0371669  | 0.67495955 | NUT family member 2D                                                             |
| -1.256668  | 0.03823256 | 0.67495955 | protein JBTS17                                                                   |
| -1.5245004 | 0.03933363 | 0.67495955 | calcium-dependent secretion activator 1 isoform 1                                |
| 1.04580645 | 0.03965024 | 0.67495955 | synemin isoform A                                                                |
| 0.99677419 | 0.03972446 | 0.67495955 | kanadaplin                                                                       |
| 2.87761212 | 0.04018902 | 0.67495955 | zinc finger protein 92 isoform 1                                                 |
| -1.8578442 | 0.04023294 | 0.67495955 | zinc finger X-chromosomal protein isoform 3                                      |
| -1.6102518 | 0.04098197 | 0.67495955 | AT-rich interactive domain-containing protein 5B isoform 1                       |
| 1.89741935 | 0.04148738 | 0.67495955 | cullin-associated NEDD8-dissociated protein 1 isoform 1                          |
| 2.63693548 | 0.04167541 | 0.67495955 | eukaryotic translation initiation factor 4 gamma 1 isoform 1                     |
| -1.0737097 | 0.04181102 | 0.67495955 | pleckstrin homology domain-containing family H member 3 precursor                |
| 1.03537766 | 0.04235683 | 0.67495955 | AF4/FMR2 family member 3 isoform 2                                               |
| 0.82903226 | 0.04306254 | 0.67495955 | centrosomal protein of 290 kDa                                                   |
| 1.44290716 | 0.0438416  | 0.67495955 | ER degradation-enhancing alpha-mannosidase-like protein 1                        |
| 1.91599135 | 0.04387535 | 0.67495955 | dynein heavy chain 9, axonemal isoform 2                                         |
| -0.6414398 | 0.04394258 | 0.67495955 | coiled-coil domain-containing protein 33 isoform 2                               |
| 3.84612903 | 0.04480729 | 0.67495955 | synaptotagmin-like protein 2 isoform c                                           |
| 1.5316129  | 0.04506111 | 0.67495955 | arf-GAP with GTPase, ANK repeat and PH domain-containing protein 3 isoform a     |
| -1.1128521 | 0.04515593 | 0.67495955 | tyrosyl-DNA phosphodiesterase 1 isoform a                                        |
| 0.82903226 | 0.04528834 | 0.67495955 | voltage-dependent T-type calcium channel subunit alpha-1I isoform a              |
| 1.05870968 | 0.04647212 | 0.67495955 | centrosomal protein of 78 kDa isoform a                                          |
| 3.22564516 | 0.04668029 | 0.67495955 | synaptotagmin-like protein 2 isoform c                                           |
| 1.12244689 | 0.04701223 | 0.67495955 | apratxin isoform a                                                               |
| 1.60822581 | 0.04737876 | 0.67495955 | structural maintenance of chromosomes flexible hinge domain-containing protein 1 |
| -1.4911015 | 0.04754166 | 0.67495955 | endonuclease domain-containing 1 protein precursor                               |
| -1.9037018 | 0.04781143 | 0.67495955 | leucine zipper protein 1                                                         |
| 0.91580645 | 0.04785667 | 0.67495955 | protein eva-1 homolog C isoform 1 precursor                                      |
| 12.5603816 | 0.04895073 | 0.67495955 | hypothetical protein XP                                                          |
| 1.39226987 | 0.04895302 | 0.67495955 | ribosomal protein S6 kinase beta-2                                               |
| 1.12370968 | 0.04957242 | 0.67495955 | putative uncharacterized protein C20orf78 isoform 1                              |
| 1.74244689 | 0.04971065 | 0.67495955 | zinc finger protein 486                                                          |

Supplemental Table 4. Reactivity of donor viral antibody targets and allograft rejection among recipients (extension of Figure 5A)

Note: Only viral species with raw p value<0.05 were included in this table. Log<sub>2</sub> fold change represents the log<sub>2</sub> ratio of a viral species between rejection vs no rejection, and a positive log<sub>2</sub> fold change suggests reactivity of the viral species was positively associated with rejection.

| log <sub>2</sub> fold change | p value     | q value    | Viral species                  |
|------------------------------|-------------|------------|--------------------------------|
| 0.921977818                  | 0.000034698 | 0.01210959 | Human adenovirus A serotype 12 |
| 0.592284653                  | 0.00079011  | 0.08838446 | Human adenovirus A serotype 18 |
| 0.608653385                  | 0.0009587   | 0.08838446 | Human adenovirus A serotype 31 |
| 1.471358087                  | 0.00106574  | 0.08838446 | Human adenovirus 55            |
| 0.739882992                  | 0.00142125  | 0.08838446 | Human adenovirus F serotype 40 |
| 2.468602551                  | 0.0015195   | 0.08838446 | Human adenovirus C serotype 2  |
| 0.536627374                  | 0.00323715  | 0.14487367 | Human adenovirus F serotype 41 |
| 0.863699002                  | 0.00332089  | 0.14487367 | Human adenovirus E serotype 4  |
| 0.2097705                    | 0.00401277  | 0.14965096 | Mumps virus                    |
| 1.444719808                  | 0.00428799  | 0.14965096 | Human adenovirus B serotype 16 |
| 0.523125481                  | 0.004727    | 0.14997476 | Human metapneumovirus          |
| 0.727376515                  | 0.02106267  | 0.61257263 | Human adenovirus C serotype 5  |
| 0.728467968                  | 0.03043182  | 0.80919258 | Human adenovirus 14            |
| 0.127177282                  | 0.03707767  | 0.80919258 | Bundibugyo ebolavirus          |
| 0.193270379                  | 0.03753961  | 0.80919258 | Sindbis virus subtype Ockelbo  |
| 0.178113013                  | 0.03812415  | 0.80919258 | Simian foamy virus type 1      |

Supplemental Table 5. Reactivity of donor human autoantibody targets and acute rejections among recipients (extension of Figure 6)

Note: Only peptides of autoantibodies with raw p value<0.05 were included in this table. Log2 fold change represents the log2 ratio of reactivity of a autoantibody peptide between rejection vs no rejection, and a positive log2 fold change suggests reactivity of the autoantibody peptide was positively associated with rejection.

| log2 fold change | p value    | q value    | Peptides of autoantibodies                                                        |
|------------------|------------|------------|-----------------------------------------------------------------------------------|
| 3.74123418       | 0.0021464  | 0.91373216 | hypothetical protein LOC390760                                                    |
| 1.73569093       | 0.00402246 | 0.91373216 | zinc finger protein 676                                                           |
| 1.43165084       | 0.00421624 | 0.91373216 | insulin-like peptide INSL6 precursor                                              |
| 3.53337025       | 0.00937175 | 0.91373216 | ankyrin repeat domain-containing protein 50 isoform 1                             |
| 1.4975           | 0.00946652 | 0.91373216 | uncharacterized protein KIAA1109                                                  |
| 1.43281646       | 0.01001021 | 0.91373216 | SH3 and multiple ankyrin repeat domains protein 1                                 |
| 2.4239557        | 0.01014586 | 0.91373216 | potassium/sodium hyperpolarization-activated cyclic nucleotide-gated channel 4    |
| 5.05144515       | 0.01235376 | 0.91373216 | transcription factor SPT20 homolog-like 1 precursor                               |
| 3.36243671       | 0.01391785 | 0.91373216 | histone acetyltransferase KAT7 isoform 1                                          |
| 2.7028692        | 0.01611943 | 0.91373216 | histone acetyltransferase KAT7 isoform 1                                          |
| 1.47920359       | 0.01695036 | 0.91373216 | oxygen-regulated protein 1                                                        |
| 1.1555116        | 0.02005268 | 0.91373216 | bromo adjacent homology domain-containing 1 protein isoform a                     |
| 1.96714135       | 0.02151399 | 0.91373216 | PHD finger protein 19 isoform a                                                   |
| 2.81012658       | 0.02371667 | 0.91373216 | rap1 GTPase-activating protein 1 isoform b                                        |
| 5.61739979       | 0.02386964 | 0.91373216 | F-box-like/WD repeat-containing protein TBL1XR1 isoform 1                         |
| 1.28522679       | 0.02440402 | 0.91373216 | transcription termination factor 1 isoform 1                                      |
| 0.96380274       | 0.02627251 | 0.91373216 | zinc finger protein 676                                                           |
| 3.8958808        | 0.02844267 | 0.91373216 | hypothetical protein XP                                                           |
| 1.87044304       | 0.02879495 | 0.91373216 | calcium-dependent secretion activator 1 isoform 1                                 |
| 5.06482068       | 0.02888766 | 0.91373216 | zinc finger protein with KRAB and SCAN domains 2                                  |
| 1.74945675       | 0.03165535 | 0.91373216 | protein phosphatase 1 regulatory subunit 12B isoform a                            |
| 1.42945675       | 0.03736571 | 0.91373216 | EKC/KEOPS complex subunit GON7                                                    |
| 4.14253165       | 0.03855123 | 0.91373216 | voltage-dependent R-type calcium channel subunit alpha-1E isoform 3               |
| 2.048423         | 0.03910064 | 0.91373216 | A disintegrin and metalloproteinase with thrombospondin motifs 3 preproprotein    |
| 1.60609705       | 0.04302606 | 0.91373216 | nuclear receptor subfamily 1 group 1 member 2 isoform 2                           |
| -3.6744093       | 0.04671272 | 0.91373216 | activin receptor type-2B precursor                                                |
| -2.7113924       | 0.04920173 | 0.91373216 | glutaredoxin-3 isoform 1                                                          |
| 2.38957806       | 0.04928123 | 0.91373216 | arf-GAP with GTPase, ANK repeat and PH domain-containing protein 2 isoform PIKE-L |
